# Supplementary material
Source: publisher site journal article supplement (https://www.dovepress.com/article/107345)
Supplement: Supplementary file 1 [file get_supplementary_file.php]

## Supporting information

# Effective combination treatment of lung cancer cells by single vehicular delivery of siRNA and different anticancer drugs

Jinming Li,<sup>‡</sup> Yuanyuan Wang,<sup>‡</sup> Shanshan Xue, Jinghua Sun, Wei Zhang, Ping Hu, Liangnian Ji, Zongwan Mao\*

MOE Key Laboratory of Bioinorganic and Synthetic Chemistry, School of Chemistry and Chemical Engineering, Sun Yat-sen University, Guangzhou 510275, China

Correspondence: Zongwan Mao

MOE Key Laboratory of Bioinorganic and Synthetic Chemistry, School of Chemistry and Chemical Engineering, Sun Yat-sen University, Guangzhou 510275, China

Tel +86 20 8411 3788

Fax +86 20 8411 2245

Email: [cesmzw@mail.sysu.edu.cn](mailto:cesmzw@mail.sysu.edu.cn)

<sup>‡</sup>Contributed equally to this paper.

**Keywords:** combination therapy, lung cancer cells, Bcl-2 siRNA, anticancer drugs, quantum dot nanocarriers

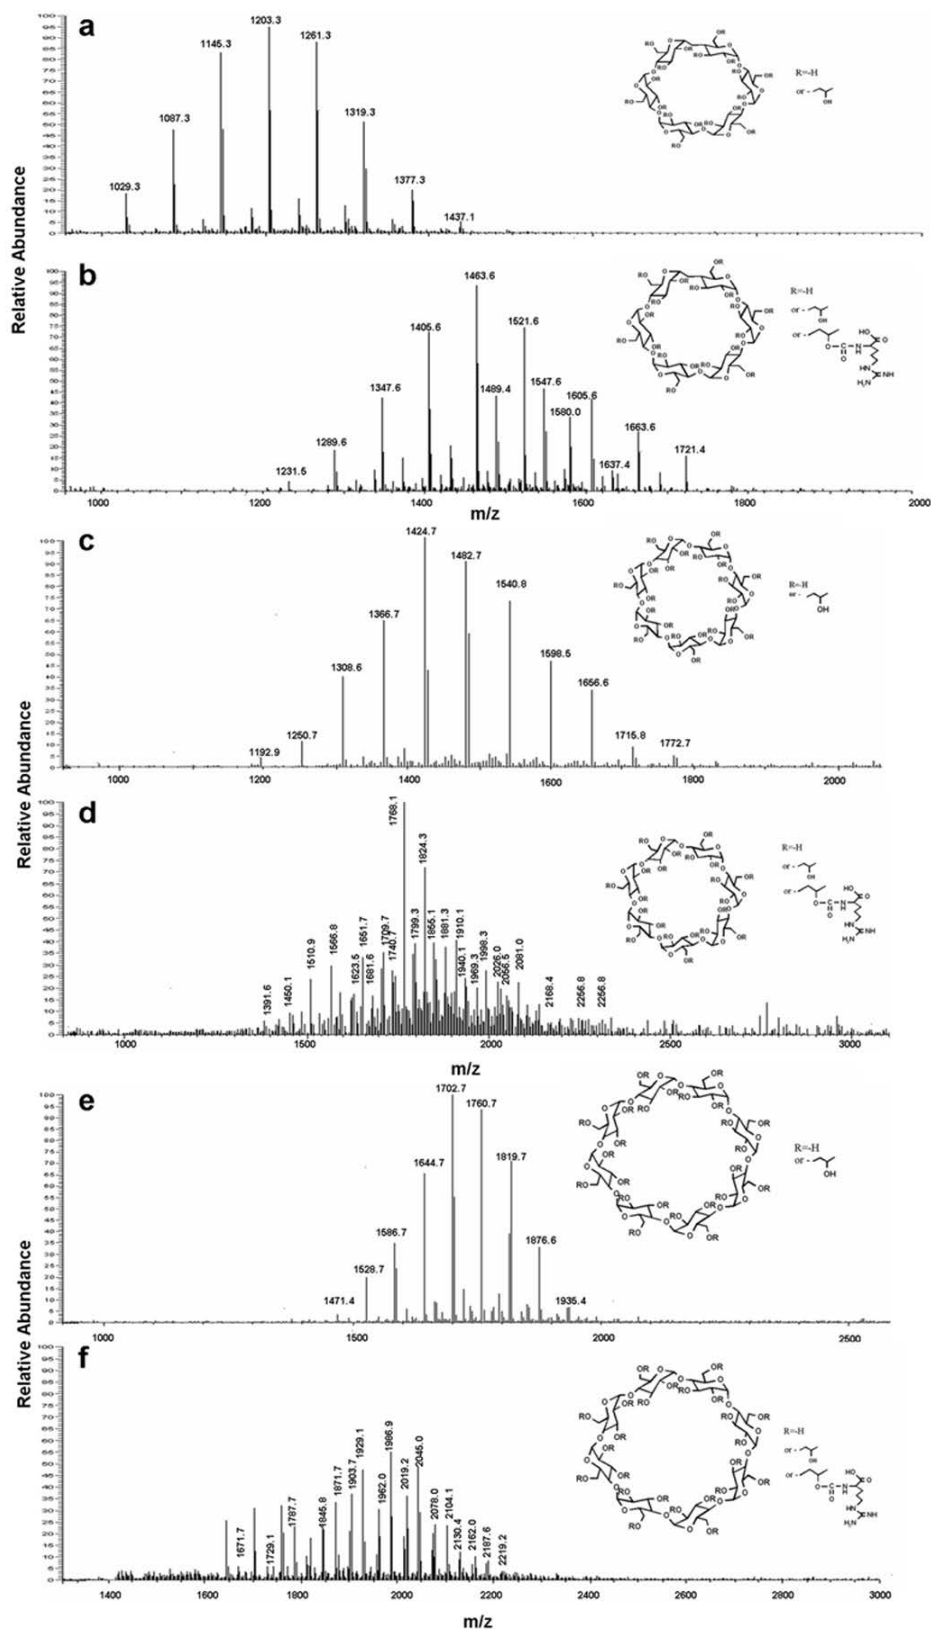

**Fig. S1.** Mass spectra and chemical structure of a) HP- $\alpha$ -CD, b) HP- $\alpha$ -CD-(L-Arg)<sub>2</sub>, c) HP- $\beta$ -CD, d) HP- $\beta$ -CD-(L-Arg)<sub>2</sub>, e) HP- $\gamma$ -CD and f) HP- $\gamma$ -CD-(L-Arg)<sub>2</sub>.

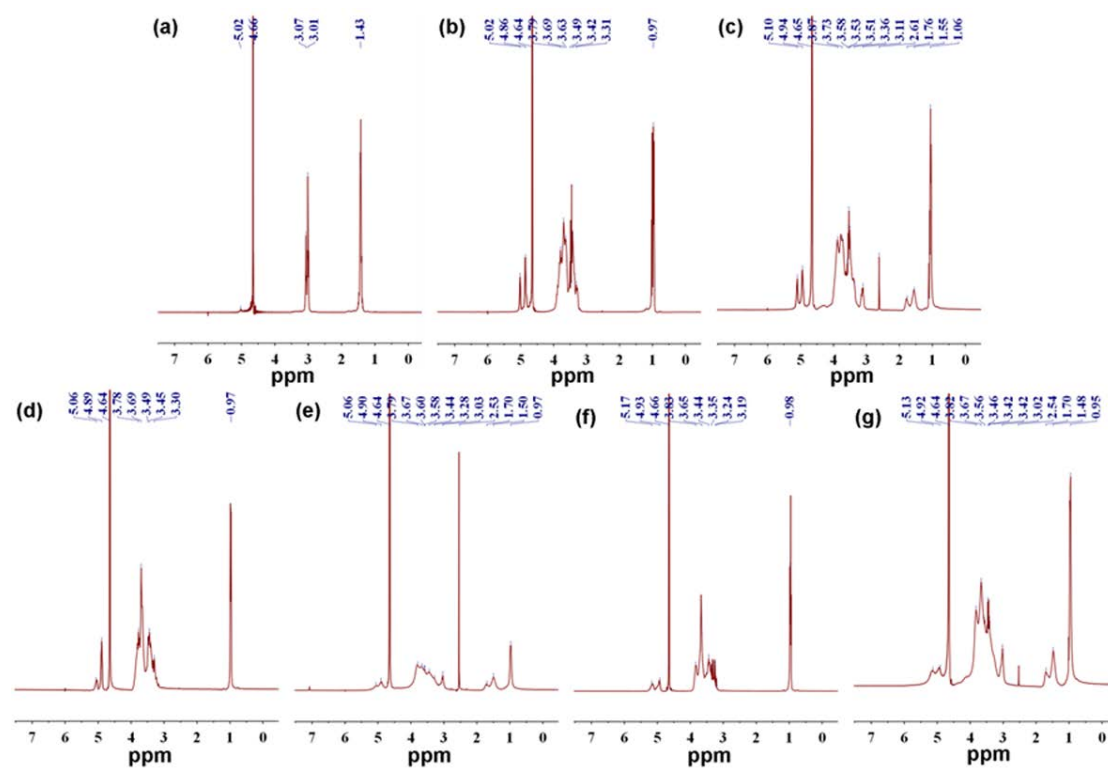

**Fig. S2**  $^1\text{H}$  NMR spectra (300 MHz, room temperature) in  $\text{D}_2\text{O}$  of a)  $(\text{L-Arg})_2$ , b)  $\text{HP-}\alpha\text{-CD}$ , c)  $\text{HP-}\alpha\text{-CD-(L-Arg)}_2$ , d)  $\text{HP-}\beta\text{-CD}$ , e)  $\text{HP-}\beta\text{-CD-(L-Arg)}_2$ , f)  $\text{HP-}\gamma\text{-CD}$ , g)  $\text{HP-}\gamma\text{-CD-(L-Arg)}_2$ .

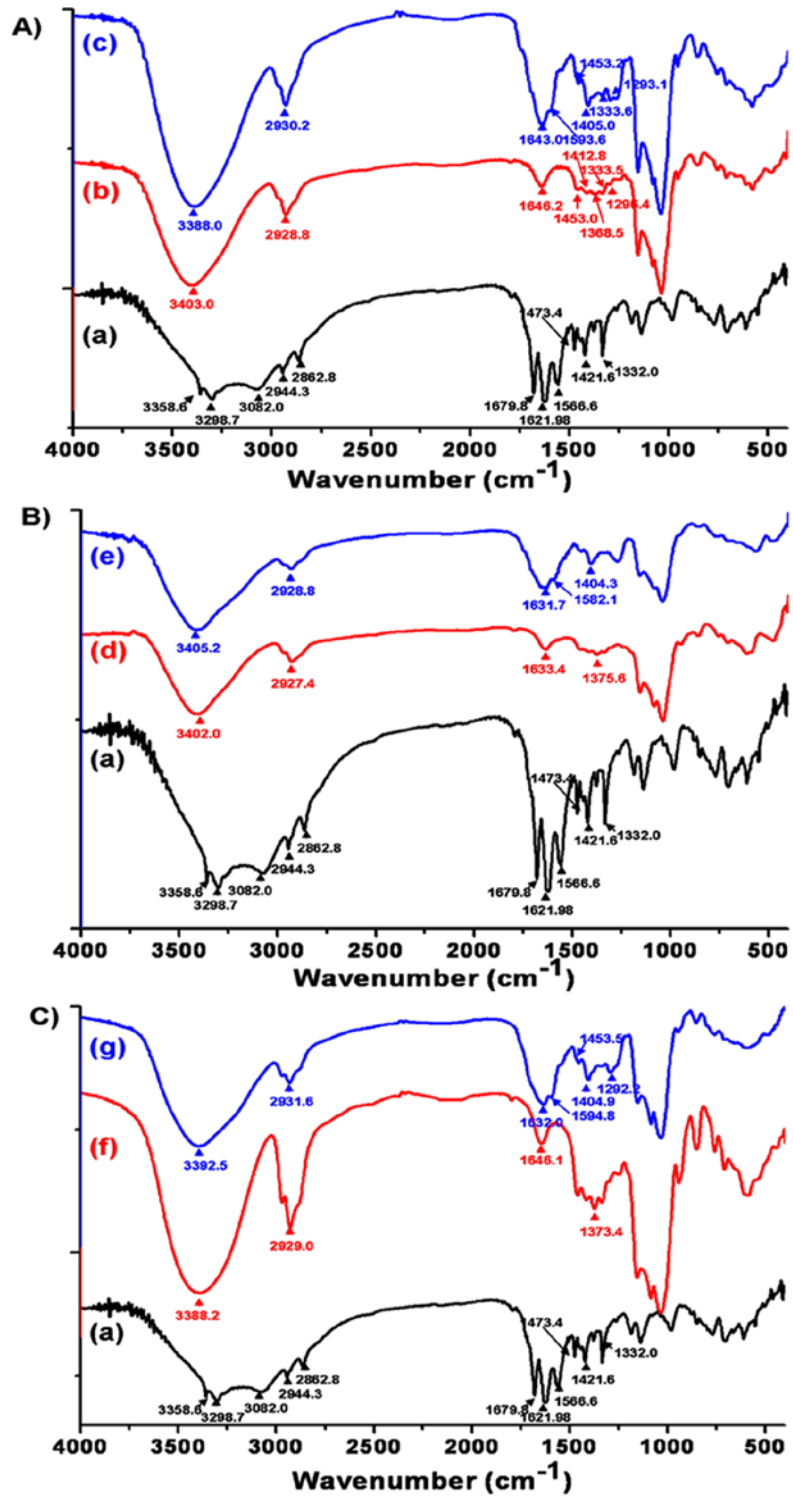

**Fig. S3** Infrared spectrum of a) L-Arg, b) HP- $\alpha$ -CD, c) HP- $\alpha$ -CD-(L-Arg)<sub>2</sub>, d) HP- $\beta$ -CD, e) HP- $\beta$ -CD-(L-Arg)<sub>2</sub>, f) HP- $\gamma$ -CD, g) HP- $\gamma$ -CD-(L-Arg)<sub>2</sub>. The obtained products were dispersed in KBr and the mixtures were compressed to form disks for FTIR spectrum.

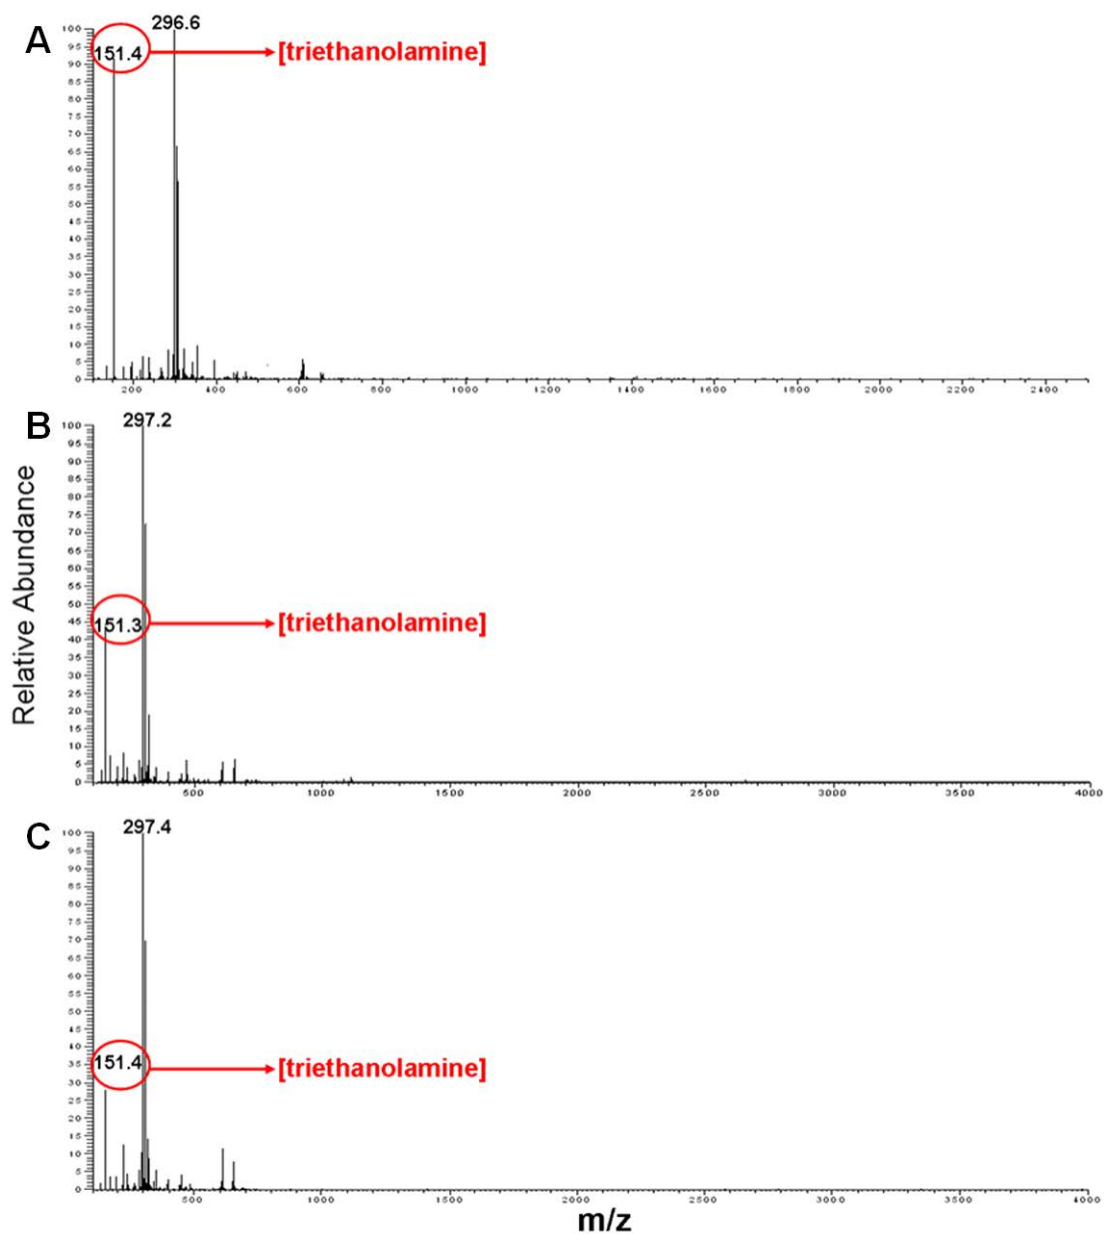

**Fig. S4.** MS of filter liquor obtained from the ligand exchange reaction for synthesis of A) HP- $\alpha/\beta$ -CD-(L-Arg)<sub>2</sub>-QDs, B) HP- $\alpha/\gamma$ -CD-(L-Arg)<sub>2</sub>-QDs and C) HP- $\beta/\gamma$ -CD-(L-Arg)<sub>2</sub>-QDs by ultrafiltration (Mw=10 K).

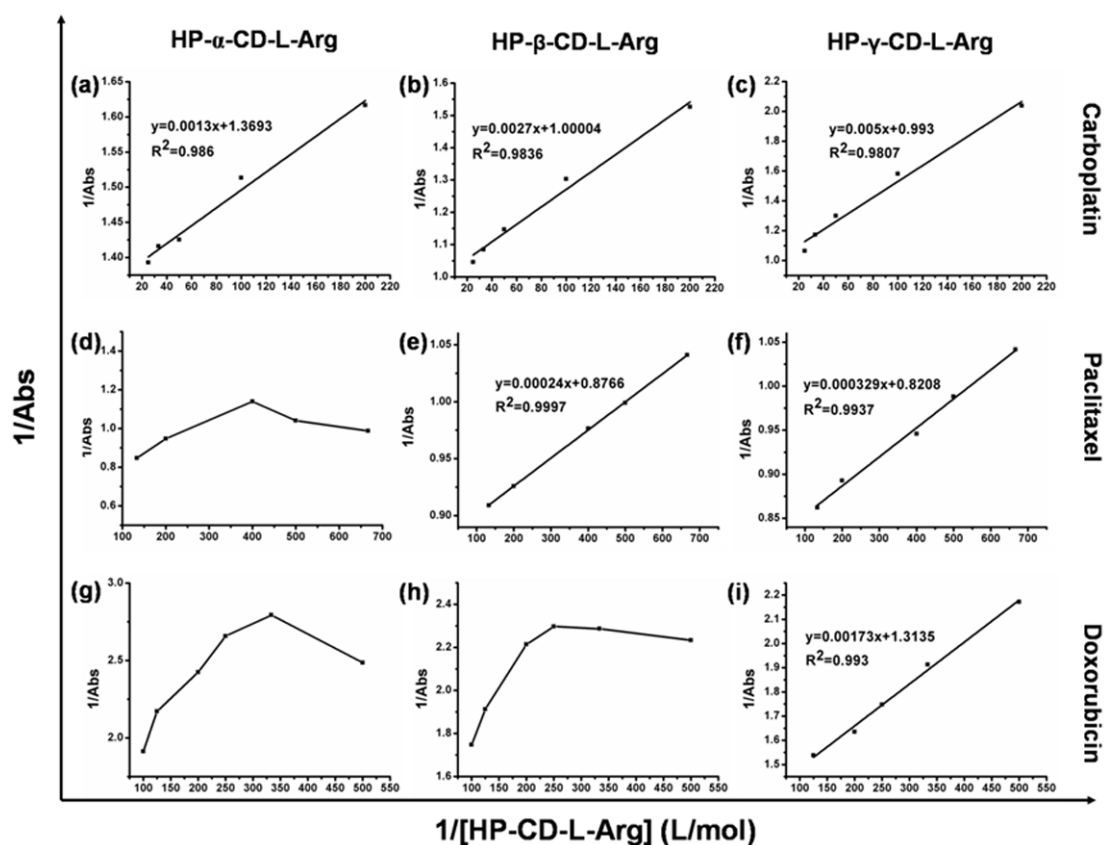

**Fig. S5.** The absorbance change of a) Carbo/HP- $\alpha$ -CD-(L-Arg)<sub>2</sub>, b) Carbo/HP- $\beta$ -CD-(L-Arg)<sub>2</sub>, c) Carbo/ HP- $\gamma$ -CD-(L-Arg)<sub>2</sub>, d) Tax/ HP- $\alpha$ -CD-(L-Arg)<sub>2</sub>, e) Tax/HP- $\beta$ -CD-(L-Arg)<sub>2</sub>, f) Tax/HP- $\gamma$ -CD-(L-Arg)<sub>2</sub>, g) Dox/ HP- $\alpha$ -CD-(L-Arg)<sub>2</sub>, h) Dox/HP- $\beta$ -CD-(L-Arg)<sub>2</sub> and i) Dox/HP- $\gamma$ -CD-(L-Arg)<sub>2</sub> complexes as the concentration of HP-CD-(L-Arg)<sub>2</sub> increased, which was determined by UV-vis spectroscopy. The existence of linear relationship between above two parameters indicated formation of 1:1 inclusion complexes of drugs with HP-CD-(L-Arg)<sub>2</sub>.

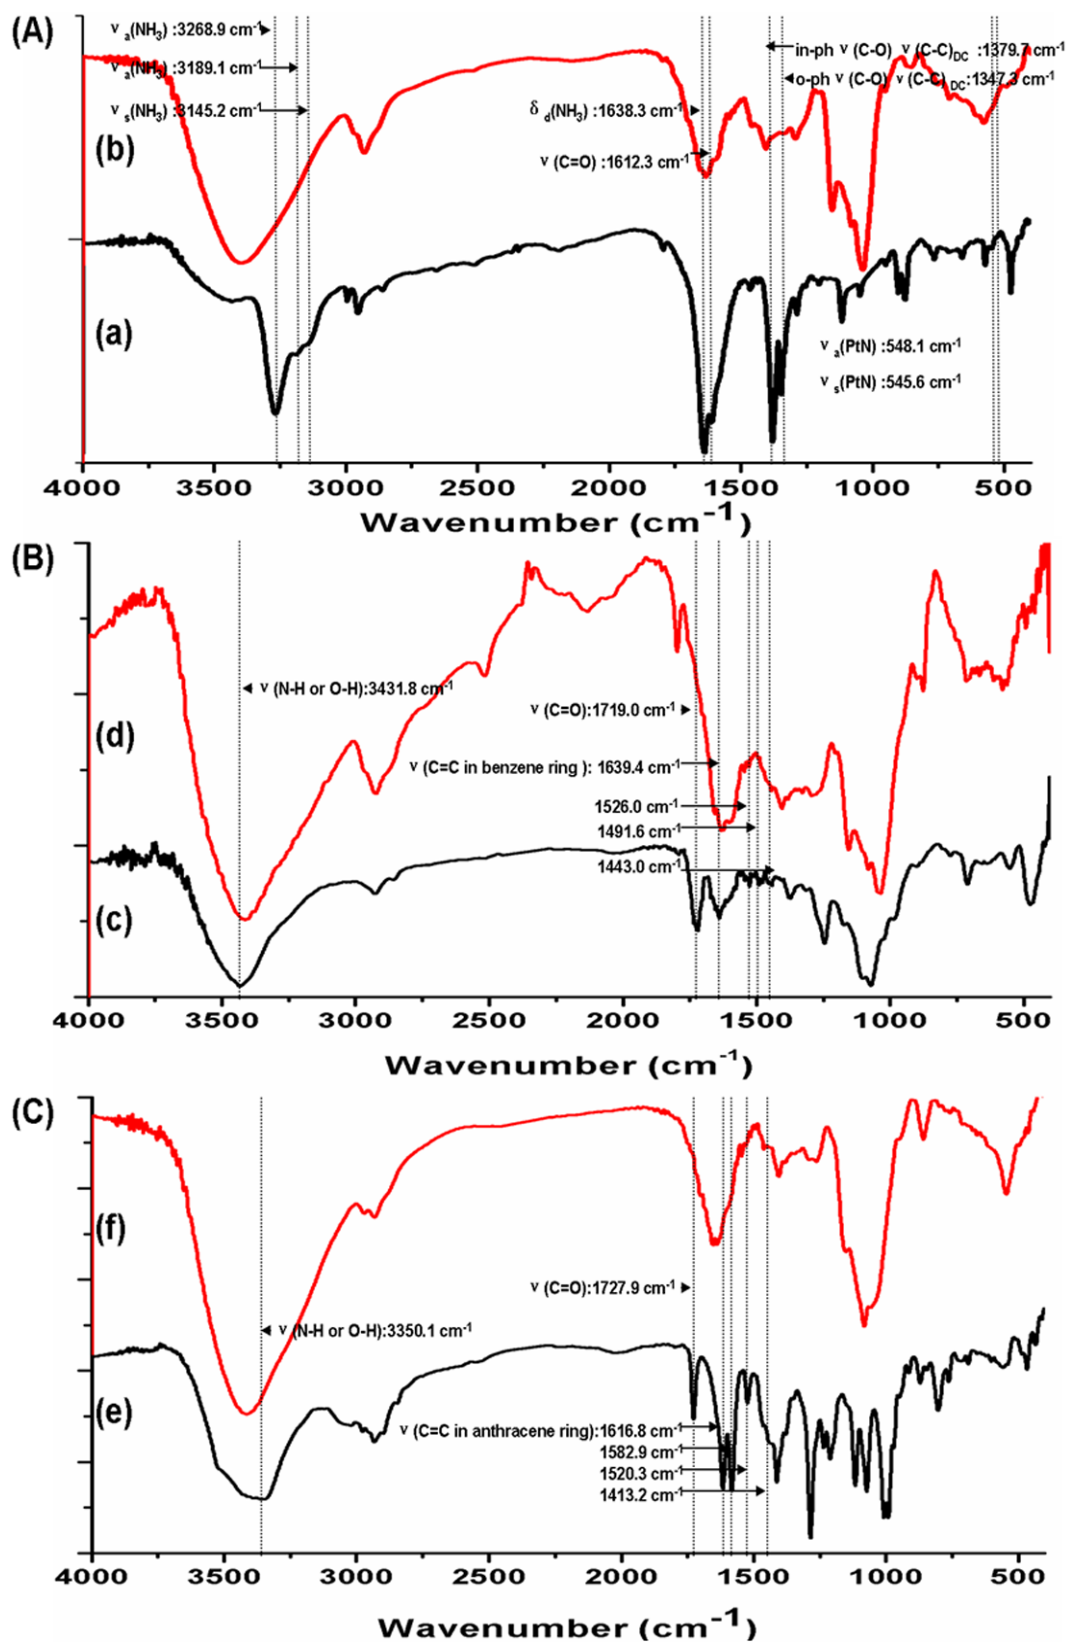

**Fig. S6.** The FTIR spectra of a) Carbo, b) Carbo/HP- $\alpha$ -CD-(L-Arg)<sub>2</sub>, c) Tax, d) Tax/HP- $\beta$ -CD-(L-Arg)<sub>2</sub>, e) Dox, f) Dox/HP- $\gamma$ -CD-(L-Arg)<sub>2</sub> complexes.

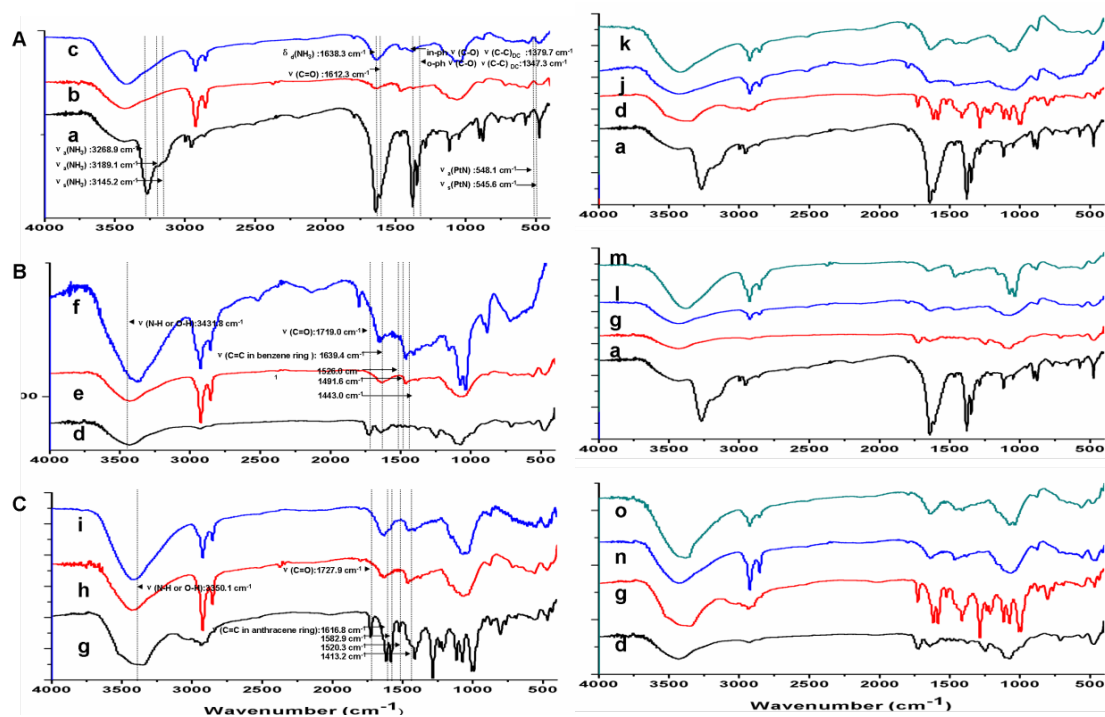

**Fig. S7.** The FTIR spectra of a) Carbo, b) HP- $\alpha$ -CD-(L-Arg)<sub>2</sub>-QDs, c) Carbo/HP- $\alpha$ -CD-(L-Arg)<sub>2</sub>-QDs, d) Tax, e) HP- $\beta$ -CD-(L-Arg)<sub>2</sub>-QDs, f) Tax/HP- $\beta$ -CD-(L-Arg)<sub>2</sub>-QDs, g) Dox, h) HP- $\gamma$ -CD-(L-Arg)<sub>2</sub>-QDs, i) Dox/HP- $\gamma$ -CD-(L-Arg)<sub>2</sub>-QDs, j) HP- $\alpha/\beta$ -CD-(L-Arg)<sub>2</sub>-QDs, k) Carbo/Tax/HP- $\alpha/\beta$ -CD-(L-Arg)<sub>2</sub>-QDs, l) Carbo/Dox/HP- $\alpha/\gamma$ -CD-(L-Arg)<sub>2</sub>-QDs, n) HP- $\beta/\gamma$ -CD-(L-Arg)<sub>2</sub>-QDs and o) Tax/Dox/HP- $\beta/\gamma$ -CD-(L-Arg)<sub>2</sub>-QDs.



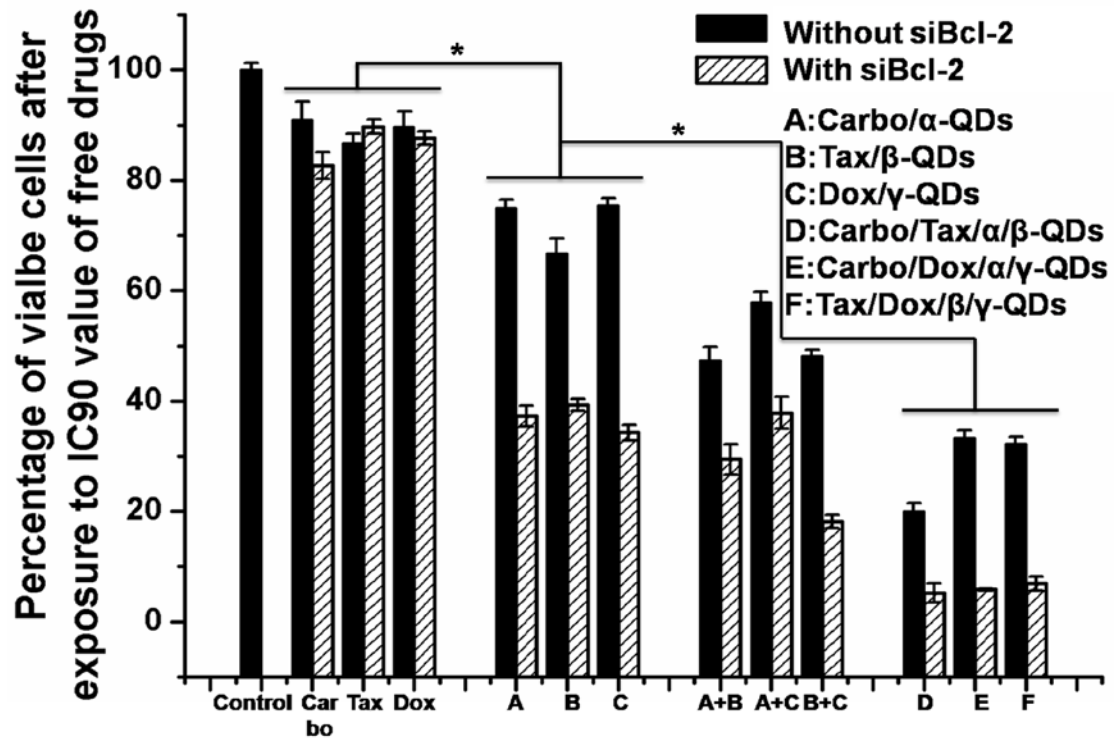

**Fig. S8.** Cell viability in A549 cells after exposure to free drugs, drug loaded QDs in the presence or absence of siBcl-2 or their cocktail for 72 h at IC90 concentration of free drugs was detected by MTT assay. The concentration of siRNA was 50 nM. The incubation time was 72 h.

**Tabel. S1** Theoretical values of molecular weight and data detected by MS for A) HP- $\alpha$ -CD and HP- $\alpha$ -CD-(L-Arg)<sub>2</sub>, B) HP- $\beta$ -CD and HP- $\beta$ -CD-(L-Arg)<sub>2</sub>, C) HP- $\gamma$ -CD and HP- $\gamma$ -CD-(L-Arg)<sub>2</sub> at different degree of hydroxypropylation and with different number of (L-Arg)<sub>2</sub> coupled to HP-CDs.

| <b>A</b>                |                    |              |               |                    |               |
|-------------------------|--------------------|--------------|---------------|--------------------|---------------|
| Number of hydroxypropyl | Theoretical values | Values in MS | Number of Arg | Theoretical values | Values in MS  |
| 1                       | 1030.92            | 1029.3       | 1             | 1231.12            | 1231.5        |
| 2                       | 1089.00            | 1087.3       | 1/2           | 1289.20/1489.39    | 1289.6/1489.4 |
| 3                       | 1147.08            | 1145.3       | 1/2           | 1347.27/1547.47    | 1347.6/1547.6 |
| 4                       | 1205.16            | 1203.3       | 1/2           | 1405.36/1605.55    | 1405.6/1605.6 |
| 5                       | 1263.24            | 1261.3       | 1/2           | 1463.43/1663.63    | 1463.6/1663.6 |
| 6                       | 1321.32            | 1319.3       | 1/2           | 1521.51/1721.70    | 1521.6/1721.4 |
| 7                       | 1379.40            | 1377.3       | 1/2           | 1579.59/1779.78    | 1580.0/--     |
| 8                       | 1437.48            | 1437.1       | 1/2           | 1637.67/1837.86    | 1637.4/--     |

  

| <b>B</b>                |                    |              |               |                                 |                             |
|-------------------------|--------------------|--------------|---------------|---------------------------------|-----------------------------|
| Number of hydroxypropyl | Theoretical values | Values in MS | Number of Arg | Theoretical values              | Values in MS                |
| 1                       | 1193.06            | 1192.9       | 1             | 1393.26                         | 1391.6                      |
| 2                       | 1251.14            | 1250.7       | 1/2           | 1451.33/1651.53                 | 1450.1/1651.7               |
| 3                       | 1309.22            | 1308.6       | 1/2/3         | 1509.42/1709.61/1909.81         | 1510.9/1709.7/1910.1        |
| 4                       | 1367.30            | 1366.7       | 1/2/3/4       | 1567.50/1767.69/1967.89/2168.08 | 1566.8/1768.1/1969.3/2168.4 |
| 5                       | 1425.38            | 1424.7       | 1/2/3         | 1625.58/1825.77/2025.96         | 1623.5/1824.3/2026.9        |
| 6                       | 1483.46            | 1482.7       | 1/2/3         | 1683.65/1883.85/2084.04         | 1799.3/1881.3/2081.0        |
| 7                       | 1541.54            | 1540.8       | 1/2/3         | 1741.73/1941.93                 | 1740.7/1940.1               |
| 8                       | 1599.62            | 1598.5       | 1/2/3         | 1799.81/2000.01/2200.20         | 1801.1/1998.3/2200.5        |
| 9                       | 1657.70            | 1656.6       | 1/2/3         | 1857.89/2058.09/2258.28         | 1855.1/2056.5/2256.8        |
| 10                      | 1715.78            | 1715.8       | 1/2/3         | 1915.97/2116.2/2316.4           | --/--/2316.4                |
| 11                      | 1773.85            | 1772.7       | 1/2/3         | 1974.1/2174.2/2374.4            | 1972.2/2172.1/2372.1        |

**C**

| Number of hydroxypropyl | Theoretical values | Values in MS | Number of Arg | Theoretical values              | Values in MS                |
|-------------------------|--------------------|--------------|---------------|---------------------------------|-----------------------------|
| 1                       | 1355.2             | --           | 1             | 1555.4                          | --                          |
| 2                       | 1413.3             | --           | 1/2           | 1613.5/1813.7                   | --/--                       |
| 3                       | 1471.4             | 1471.4       | 1/2/3         | 1671.6/1871.7/<br>2071.9        | 1671.7/1871.7               |
| 4                       | 1529.4             | 1528.7       | 1/2/3/4       | 1729.6/1929.8/<br>2130.0/2330.2 | 1729.1/1929.1/<br>2130.4/-- |
| 5                       | 1587.5             | 1586.7       | 1/2/3         | 1787.7/1987.9/<br>2188.1        | 1787.7/1986.9/<br>2187.6    |
| 6                       | 1645.6             | 1644.7       | 1/2/3         | 1845.8/2046.0/<br>2246.2        | 1845.8/2045.0/<br>--        |
| 7                       | 1703.7             | 1702.7       | 1/2/3         | 1903.9/2104.1/<br>2304.2        | 1903.7/2104.1/<br>--        |
| 8                       | 1761.8             | 1760.7       | 1/2/3         | 1962.0/2162.1/<br>2362.3        | 1962.0/2162.0/<br>--        |
| 9                       | 1819.8             | 1819.7       | 1/2/3         | 2020.0/2220.2/<br>2420.4        | 2019.2/2219.2/<br>--        |
| 10                      | 1877.9             | 1876.6       | 1/2/3         | 2078.1/2278.3/<br>2478.5        | 2078.0/--/--                |
| 11                      | 1936.0             | 1935.4       | 1/2/3         | 2136.2/2336.4/<br>2536.6        | --/--/--                    |

**Table S2.** Zeta potentials of  $\alpha$ -QDs,  $\beta$ -QDs,  $\gamma$ -QDs,  $\alpha/\beta$ -QDs,  $\alpha/\gamma$ -QDs and  $\beta/\gamma$ -QDs.

| QDs                    | $\alpha$ -QD | $\beta$ -QD | $\gamma$ -QD | $\alpha/\beta$ -QD | $\alpha/\gamma$ -QD | $\beta/\gamma$ -QD |
|------------------------|--------------|-------------|--------------|--------------------|---------------------|--------------------|
| Zeta potential<br>(mV) | 26.9         | 21.4        | 17.8         | 22.6               | 20.6                | 19.8               |

**Table S3.** Stability constants of inclusion complexes of carboplatin, paclitaxel and doxorubicin respectively with HP- $\alpha$ -CD-(L-Arg)<sub>2</sub>, HP- $\beta$ -CD-(L-Arg)<sub>2</sub> and HP- $\gamma$ -CD-(L-Arg)<sub>2</sub>, determined by UV spectroscopic titration. "--" indicated the nonexistence of formation of 1:1 inclusion complexes of drugs with HP-CD-(L-Arg)<sub>2</sub>.

---

| <b>Stability constant<br/>(10<sup>3</sup> M<sup>-1</sup>)</b> | <b>HP-<math>\alpha</math>-CD-(L-Arg)<sub>2</sub></b> | <b>HP-<math>\beta</math>-CD-(L-Arg)<sub>2</sub></b> | <b>HP-<math>\gamma</math>-CD-(L-Arg)<sub>2</sub></b> |
|---------------------------------------------------------------|------------------------------------------------------|-----------------------------------------------------|------------------------------------------------------|
| <b>Carboplatin</b>                                            | 1.05                                                 | 0.37                                                | 0.20                                                 |
| <b>Paclitaxel</b>                                             | --                                                   | 3.65                                                | 2.49                                                 |
| <b>Doxorubicin</b>                                            | --                                                   | --                                                  | 0.76                                                 |

---
